# Supplementary material for: Mutations in the nuclear bile acid receptor FXR cause progressive familial intrahepatic cholestasis
Source: Nat Commun. 2016 Feb 18;7:10713. doi: 10.1038/ncomms10713 (PMC4759630; doi:10.1038/ncomms10713)
Supplement: Supplementary Information — Supplementary Figures 1-7 and Supplementary Tables 1-2 [file ncomms10713-s1.pdf]

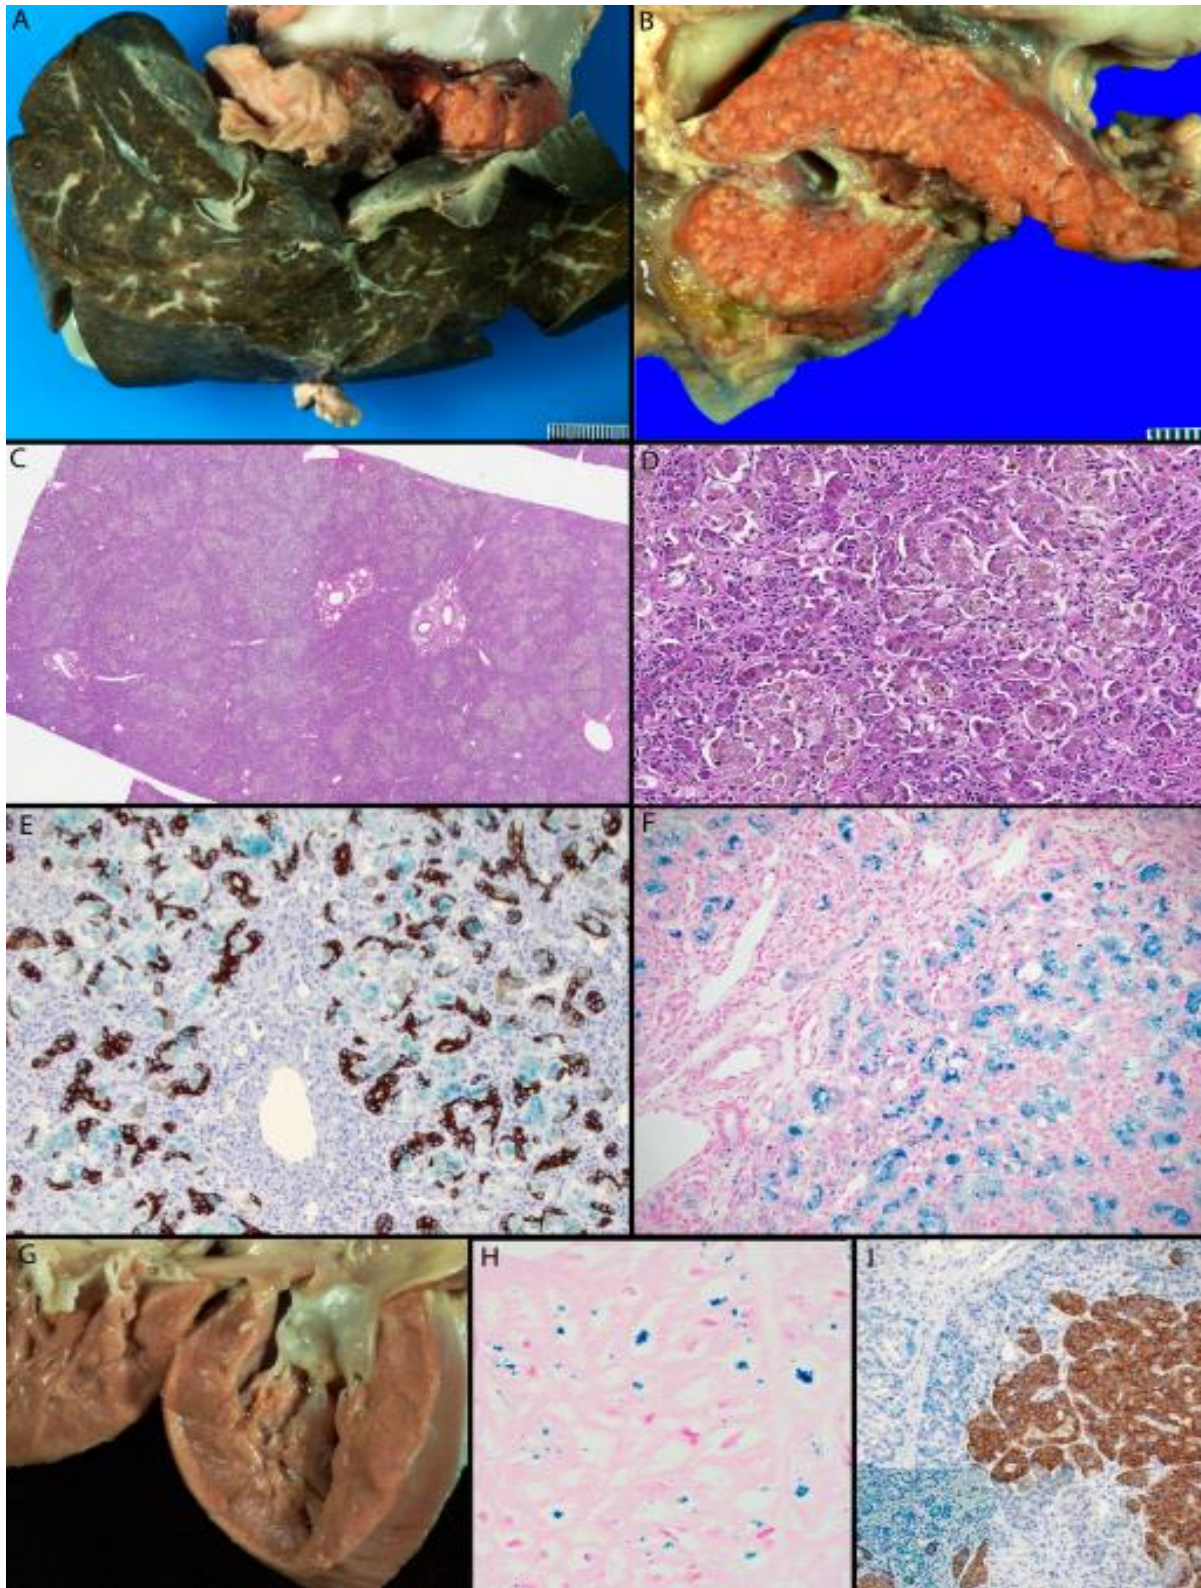

**Supplementary Figure 1. Postmortem findings patient 3.** A. Diffusely cholestatic liver at autopsy. B. Enlarged pancreas with yellow-orange lobular parenchyma. C-D.

Liver with giant cell transformation and ballooning hepatopathy with intrahepatic cholestasis and ductular proliferation (**C.** H&E, low magnification, **D.** H&E 400x magnification). **E.** Cytokeratin 7 highlights extensive ductular proliferation and transformation of the hepatocytes with intrahepatic siderosis highlighted by the dual counter iron stain (Immunohistochemistry 10x). **F.** Iron stain highlights extensive hemosiderosis of the liver (Prussian blue stain 20x). **G.** Left ventricular concentric hypertrophy (0.9 cm wall thickness). **H.** Iron stain shows mild siderosis in swollen cardiomyocytes (Prussian blue 100x). **I.** Synaptophysin highlights pancreatic endocrine hyperplasia and mild siderosis by the dual counter iron stain (inlet) of the exocrine acini (Immunohistochemistry 20x).

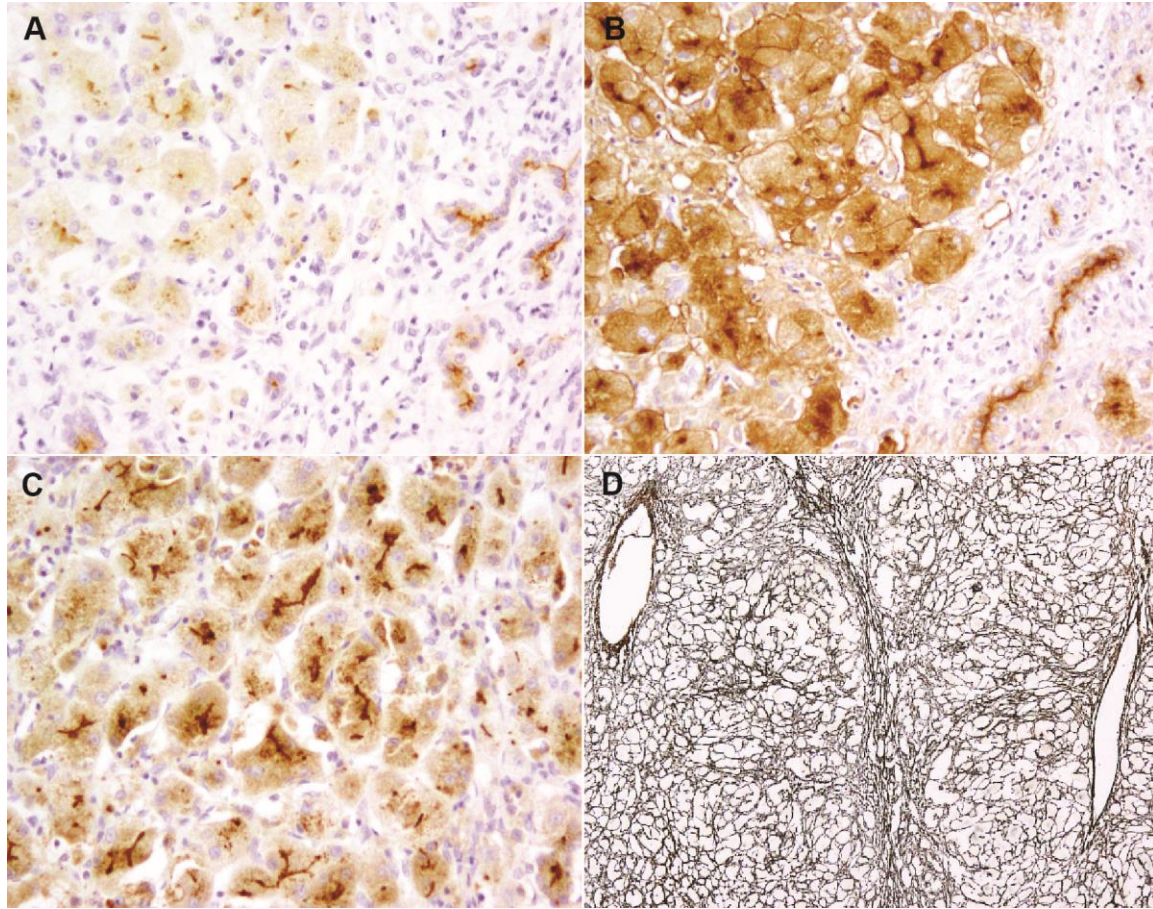

**Supplementary Figure 2. Additional histological findings, explanted liver, Patient 1.** Distorted bile-canaliculus network margins marked immunohistochemically for alanyl aminopeptidase, GGT, and MRP2 (A - C respectively; diaminobenzidine chromogen, haematoxylin counterstain; all original magnifications 200x). Perisinusoidal and perihepatocytic reticulin fibers are prominently increased (D; Gordon & Sweets ammoniacal silver; original magnification 40x).

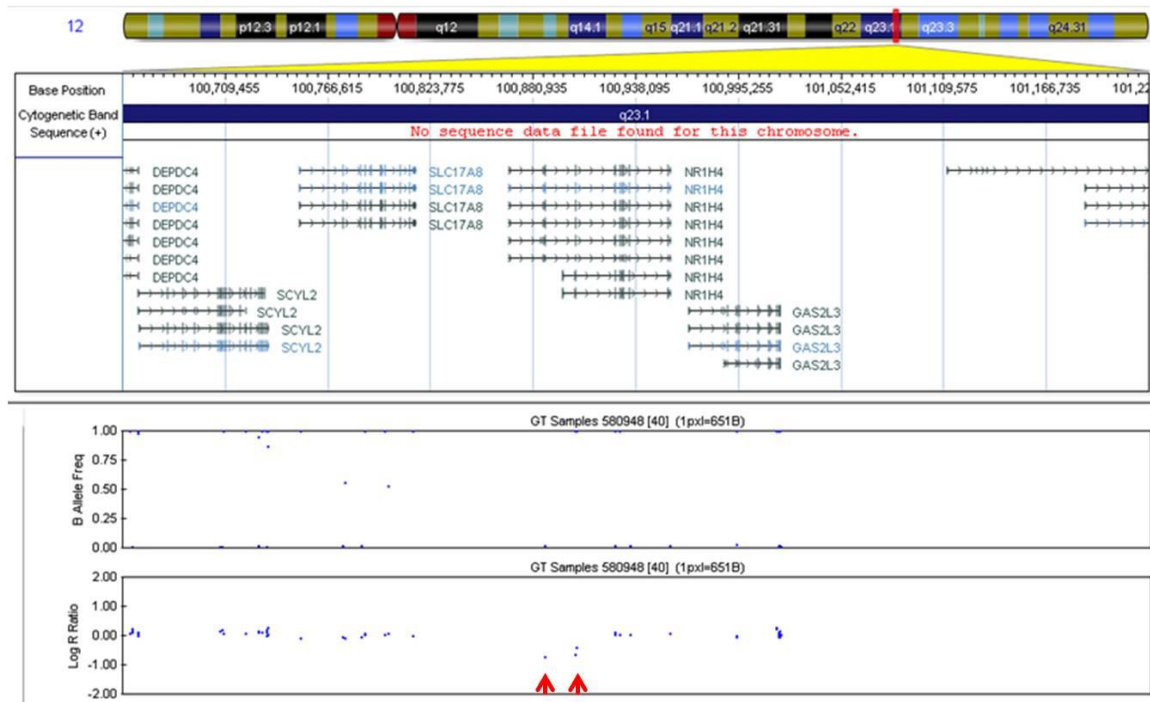

**Supplementary Figure 3. cSNP analysis shows microdeletion at *NR1H4* in the proband (patient 4) of family 2.** A snapshot of the cSNP analysis shows reduced signal intensities of three consecutive probes (red arrows), suggesting copy number loss at the *NR1H4* locus.

a

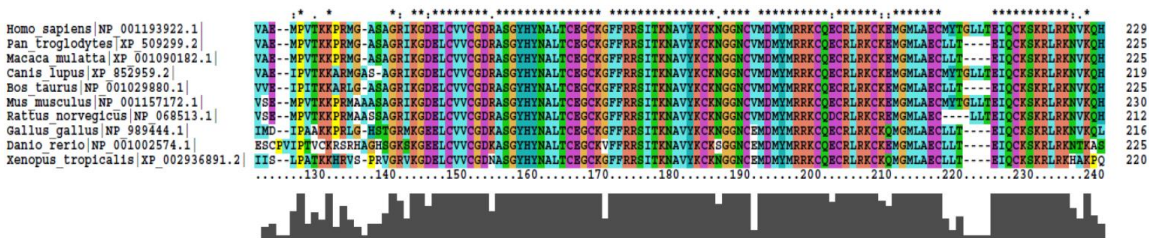

b

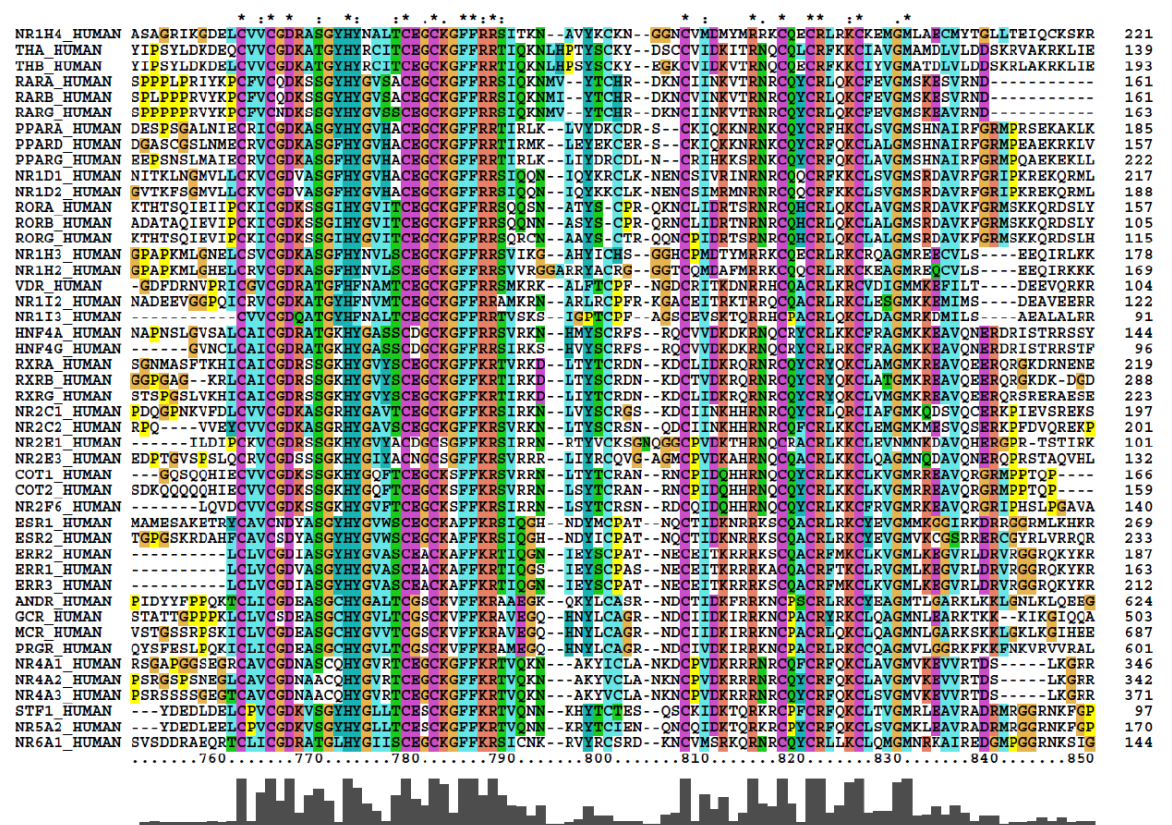

**Supplementary Figure 4. DNA binding domain of FXR is highly conserved. a** Amino acid sequence alignment of FXR DNA binding domains from different species. **b** Amino acid sequence alignment of all human nuclear receptors with DNA binding domains.

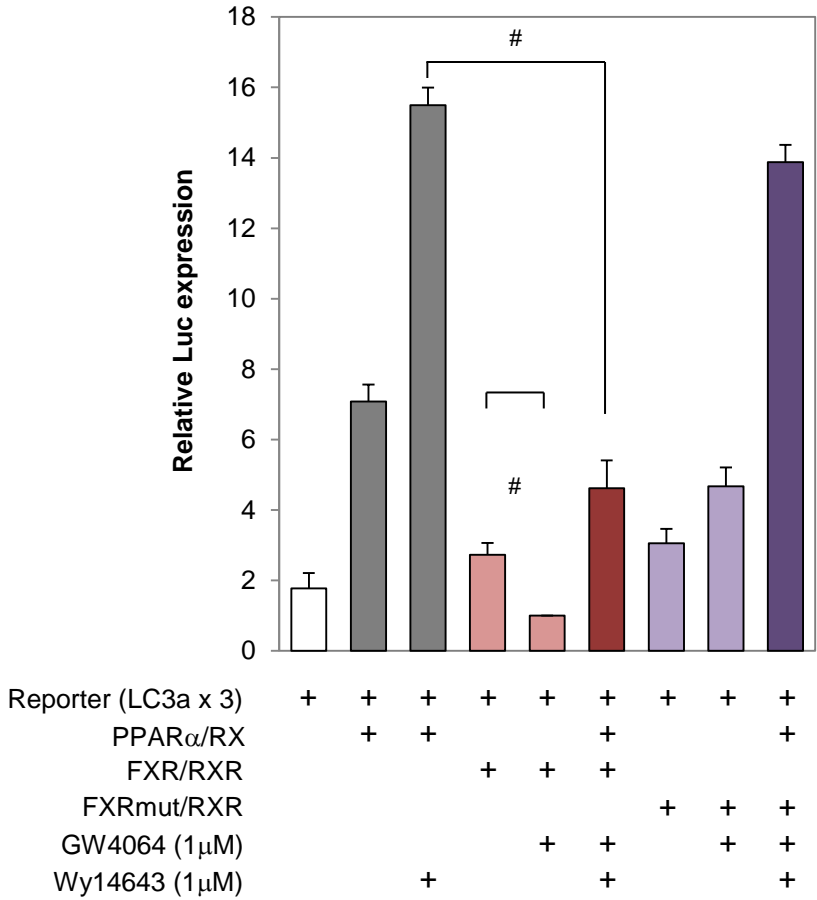

**Supplementary Figure 5. Insertion mutant FXR is defective in DR-1 transrepression.** AML12 cells were transfected with a reporter containing 3 copies of the DR-1 element from the LC3a gene, which was previously shown to be transactivated by PPAR $\alpha$  and transrepressed by FXR<sup>1</sup>, and the indicated expression vectors. The FXR agonist GW4064 decreased expression in the presence of FXR and RXR alone, and also in the presence of FXR/RXR and Wy14643 activated PPAR $\alpha$ . Both responses were lost in the single amino acid Tyr139\_Asn140insLys mutant FXR.

<sup>1</sup>Lee, J.M. *et al.* Nutrient-sensing nuclear receptors coordinate autophagy. *Nature* **516**, 112-5 (2014).

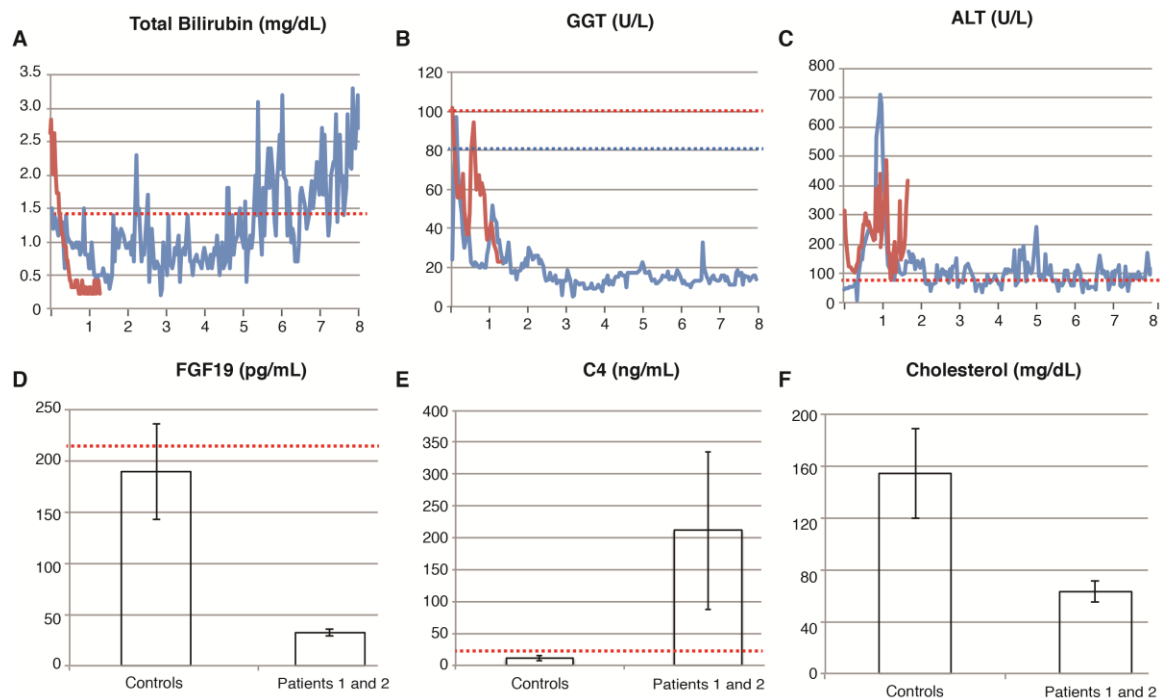

**Supplementary Figure 6. Total bilirubin, GGT, ALT, C4, FGF19 and cholesterol values after liver transplant for patients in Family 1.** **A.** total bilirubin values (mg/dL) for Patients 1 (blue) and 2 (red). X-axis, years after transplant. Dashed lines indicate upper limit of normal in the pediatric population. Notice developing conjugated hyperbilirubinemia in patient 1. **B.** GGT is stably within normal ranges for both patients. **C.** Patient 2 shows persistent moderate elevations in ALT and waxing and waning course; Patient 1 shows mild elevations. **D.** markedly decreased FGF19 levels (Patient 1, 11.1 pg/mL (assay sensitivity is 15.6 pg/mL); Patient 2, 29.4 pg/mL, **E.** increased C4 levels (Patient 1, 114 ng/mL; Patient 2, 322 ng/mL) and **F.** decreased cholesterol levels in both patients.

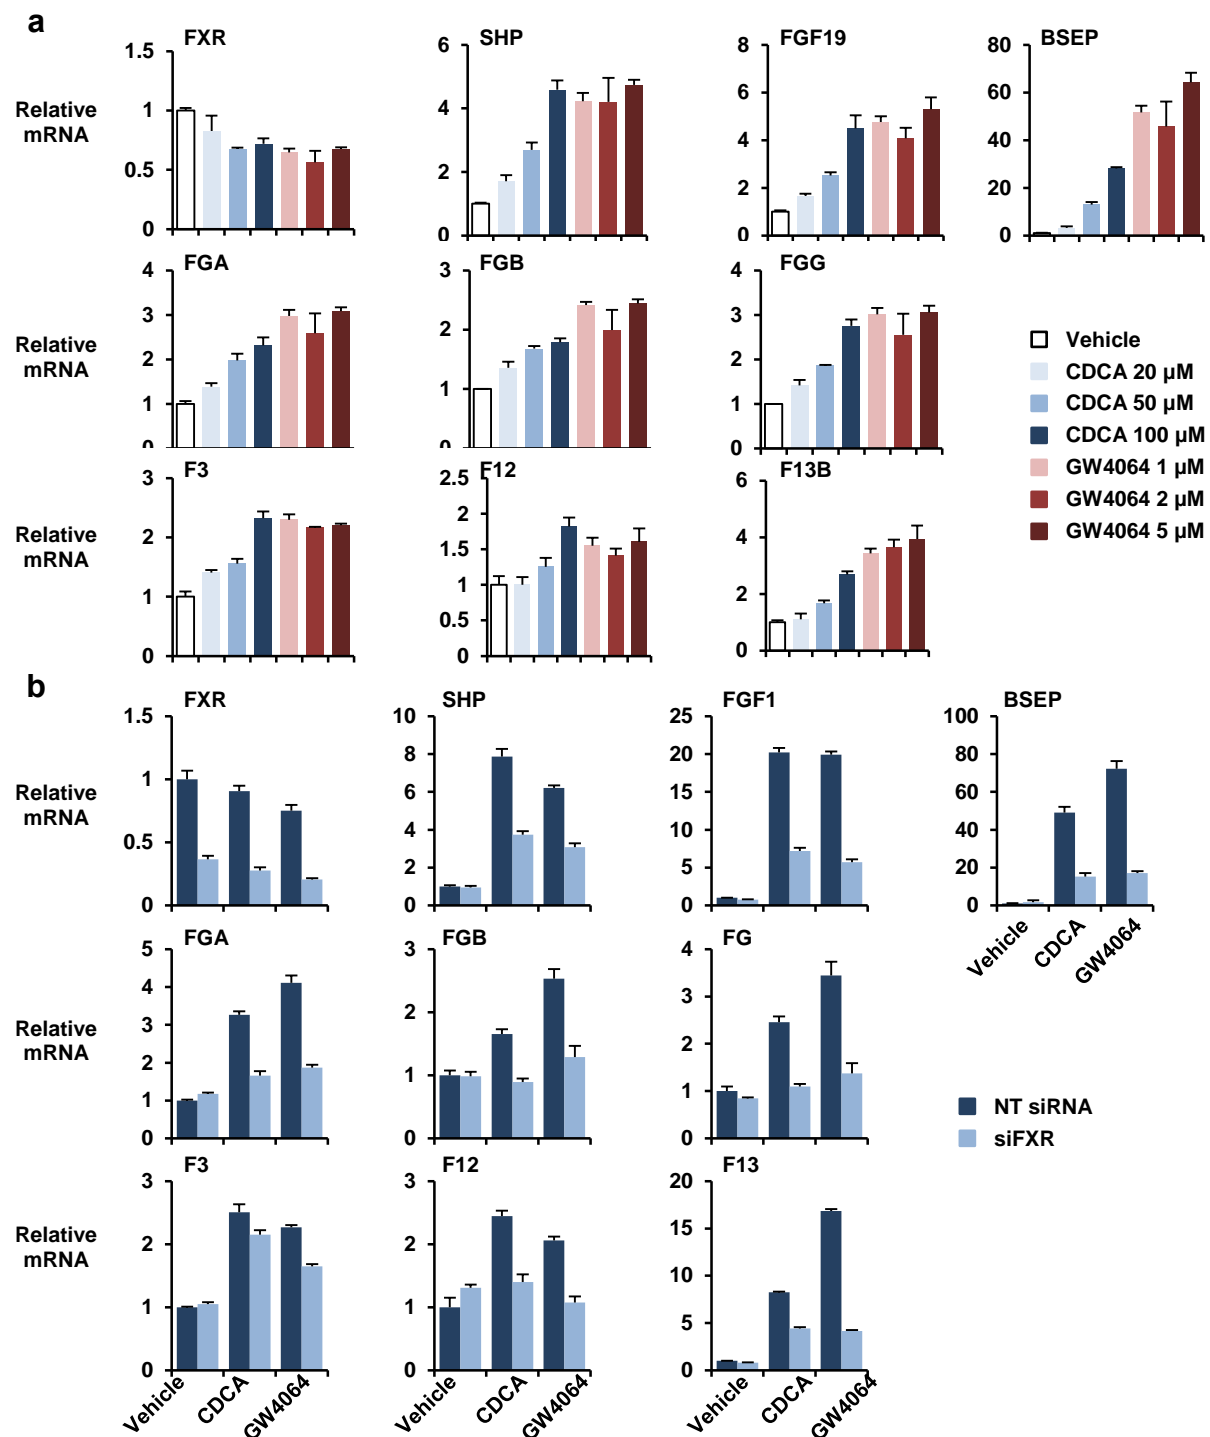

**Supplementary Figure 7. FXR induces multiple components of the coagulation cascade.** a. Huh7 cells were treated with FXR ligands (CDCA and GW4064) at

indicated concentrations and mRNA levels of coagulation core genes were assessed by real-time PCR. **b.** Huh7 cells were transfected with either non-targeting siRNA or FXR siRNA. After treatment of FXR ligands (CDCA, 100  $\mu$ M; GW4064, 1  $\mu$ M), gene expressions were analyzed by real-time PCR. All data were triplicate and represent mean  $\pm$  s.e.m. BSEP=ABCB11; FGA=Fibrinogen alpha; FGB=Fibrinogen beta; FGG=Fibrinogen gamma; F3=Tissue Factor, Tissue Thromboplastin; F12=Coagulation Factor XII, Hageman Factor; F13B=Coagulation Factor XIII B Subunit, Fibrin Stabilizing Factor B Subunit. Primers in Supplementary Table 2.

**Supplementary Table 1. Additional laboratory findings**

|                                    | Family 1  |            |           |            | Family 2  |                |                |
|------------------------------------|-----------|------------|-----------|------------|-----------|----------------|----------------|
|                                    | Patient 1 |            | Patient 2 |            | Patient 3 |                | Patient 4      |
|                                    | Initial   | Before OLT | Initial   | Before OLT | Initial   | Prior to death | Birth to death |
| <b>Liver Biochemistry</b>          |           |            |           |            |           |                |                |
| Total Bilirubin (nl <1.4 mg/dL)    | 23.8      | 29.4       | 16        | 21.1       | 14        | 35.6           | 3.9-14.1       |
| Alkaline Phosphatase (nl <400 U/L) | 627       | 515        | 586       | 1236       | 368       |                | 20-57          |
| Albumin (nl 3.5-5.0 g/dL)          | 2.1       | 2.4        | 2.5       | 2.7        | 2.8       | 3.4            | 1.5-2.5**      |
| Ammonia (umol/L)                   | 71-95     | 95-165     | 64-93     | 56-125     | 47        | 233            | 37             |
| Total Bile Acids (nl < 19.2)       | 93.7      | NM         | NM        | NM         | NM        | NM             | NM             |
| Cholic acid (nl < 3.1)             | 47.7      | NM         | NM        | NM         | NM        | NM             | NM             |
| Chenodeoxycholic acid (nl < 9.9)   | 44.5      | NM         | NM        | NM         | NM        | NM             | NM             |

NM; Not measured

\*\* These values are not representative due to transfusions required for volume/losses and blood pressure support.

**Supplementary Table 2  
Primer Sets**

| Gene  | Forward               | Reverse               |
|-------|-----------------------|-----------------------|
| GAPDH | CCAGCAAGAGCACAAAGAGGA | GAGATTCAGTGTGGTGGGGG  |
| FXR   | GCTTTGCTGAAAGGGTCTGC  | CAGAATGCCCAGACGGAAGT  |
| SHP   | TCAAGTCCATTCCGACCAGC  | AAGAAGGCCAGCGATGTCAA  |
| FGF19 | AGATCAAGGCAGTCGCTCTG  | CGGATCTCCTCCTCGAAAGC  |
| BSEP  | GAGCCTGGTCATCTTGTGCT  | TCTCCAGGGCCTGCTTATCT  |
| FGA   | CTGCCTGGTCCTAAGTGTGG  | GCAGAAGGGCCAGTCTGAAT  |
| FGB   | ACCATGGAAAAGCCACCACT  | CGTTTCTATGGGCAACAGGC  |
| FGG   | CACACAGTCTGCCATCCCATA | ACTTGTCTAGCTTCAGGTCCC |
| F3    | ACTCCCCAGAGTTCACACCT  | TCCCGGAGGCTTAGGAAAGT  |
| F12   | AGCTGAAGAGCACACAGTCG  | CGGCCCTTGTGGGTACATTT  |
| F13b  | GAATGCAATGTGACAGAGGGC | TGACTCCTCTTCTGCCATTCA |
